# Supplementary material for: Genome-Wide and Paternal Diversity Reveal a Recent Origin of Human Populations in North Africa
Source: PLoS One. 2013 Nov 27;8(11):e80293. doi: 10.1371/journal.pone.0080293 (PMC3842387; doi:10.1371/journal.pone.0080293)
Supplement: Figure S2 — Y-chromosomal phylogenetic chart. Hierarchical phylogenetic relationships and absolute frequencies of the Y-chromosomal haplogroups observed in Libyan and Moroccan populations. Nomenclature is according to Karafet et al. (2008). (PDF) [file pone.0080293.s002.pdf]

|      |       |            |          | Lybians | Moroccans |
|------|-------|------------|----------|---------|-----------|
|      |       |            |          | N=215   | N= 82     |
| M174 |       |            | D        |         |           |
|      |       |            | E        |         |           |
|      |       |            | E1       |         |           |
|      | P147  | M33        | E1a      |         |           |
|      |       |            | E1b      |         |           |
|      | P177  |            | E1b1     |         |           |
|      |       | P2         | E1b1a    | 3       | 8         |
| M96  |       | M2         | E1b1b    |         |           |
|      |       | M215       | E1b1b1   | 2       | 11        |
|      |       |            | E1b1b1a  | 29      | 1         |
| M168 |       |            | E1b1b1a4 |         | 4         |
|      |       | M35        | E1b1b1b  | 71      | 5         |
|      |       | M78        | E1b1b1b1 |         | 30        |
|      |       |            | E1b1b1b2 |         |           |
|      |       | M81        | E1b1b1c  | 4       |           |
|      |       | M107       | E1b2     |         |           |
|      |       | M123       | E1b2     |         |           |
|      | M75   |            | F        |         |           |
|      |       |            | G        |         |           |
|      |       |            | G1       |         |           |
|      | M201  | M285       | G2       |         |           |
|      |       |            | G2a      | 11      |           |
|      | P287  |            |          |         |           |
| M89  |       | P15        |          |         |           |
|      | M69   |            | H        |         |           |
|      | M170  |            | I        |         |           |
|      |       |            | J        |         |           |
|      |       |            | J1       |         | 16        |
|      |       |            | J1a      |         |           |
|      |       | M62        | J1b      |         |           |
|      |       | M365       | J1c      |         |           |
|      | M267  | M390       | J1d      |         |           |
|      |       | P56        | J1e      | 80      |           |
|      |       | P58        | J2       |         | 7         |
|      |       |            | J2a      |         |           |
|      | M172  |            | J2a1     |         |           |
|      |       | M410       | J2a2     |         |           |
|      |       |            | J2a2a    | 2       |           |
|      |       | M68        | J2a3     |         |           |
|      |       | M137       | J2a4     |         |           |
|      |       | M158       | J2a5     | 7       |           |
|      | M12   |            | J2b      |         |           |
| M9   |       |            | K        |         |           |
|      |       |            | L        |         |           |
|      | M20   |            | N        |         |           |
|      | LLY22 |            | P        |         |           |
|      | M45   |            | Q        |         |           |
|      |       | M242       | R        |         |           |
|      |       |            | R1a      | 1       |           |
|      | M207  | SRY10831.2 | R1b      | 5       |           |
|      |       | M343       | R1b1a    |         |           |
|      |       | M18        | R1b1b    |         |           |
|      | P297  |            | R1b1b2   |         |           |
|      |       | M269       | R1b1b2d  |         |           |
|      |       |            | R1b1b2g  |         |           |
|      |       | SRY2627    | R1b1b2h  |         |           |
|      |       | U106       | R1b1c    |         |           |
|      |       | U152       |          |         |           |
|      |       |            |          |         |           |
|      |       | M335       |          |         |           |
